# Supplementary material for: Overexpression of Cassava MeAnn2 Enhances the Salt and IAA Tolerance of Transgenic Arabidopsis
Source: MDPI journal article supplement (doi:10.3390/plants10050941), 2021-05-08
Supplement: s1 [file s1]

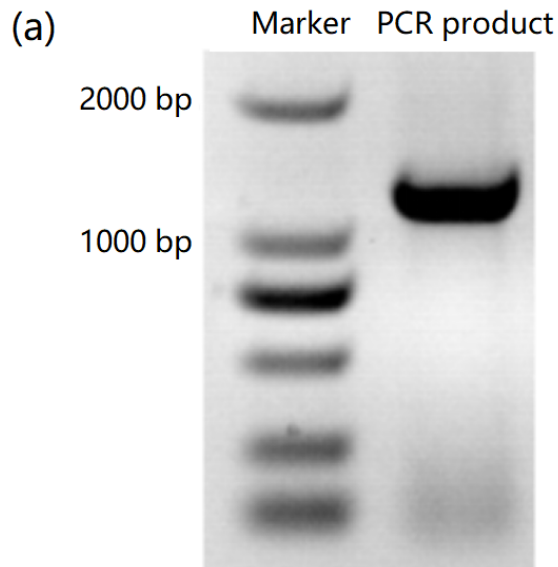

(b)

Primer MeAnn2-F

GAGTCTACACAGAGCAGAGAGCCTGAGGGAGTGTGAGCTTCGCAGATCGTTGATAG  
 AAAAAAGACACAGATCCAAAGCACTCGACAATGTCTACCCTTATAGTTCCTCATAAC  
 AGTTCCACCTGTTTCCGATGACTGTGAGCAGCTCAGAAAGGCTTTTTCAGGATGGG  
 GGACAAACGAGGGCTTGATCATATCCGTATTGGCTCACAGGAATGCTGCTCAACGC  
 AAGCTGATCAGAGAGACGTATTATGAGGCCTACGGAGAAGATCTCCTCAAGGAATT  
 GGATAGGGAACTTTCAAATGATTTTGAGAGAGTGGTGCTGCACTGGACACTTGGTC  
 CTTCTGAACGCGATGCAGTTTTAGCTAATGAGGCAGCTAAGAAATGGACATCAAGC  
 AATCAGGTTCTTATGGAAATTGCCTGCACTAGGTCCTCAAATGAACTGCTTCATGT  
 AAGACAGGCATATCATGCTCGCTACAAGAAGTCCCTTGAAGAGGATGTGGCGCAGC  
 ATACAACGGGGACTTCCGCAAGCTTTTGTTCCTCTTGTGTGCTCATACCGATAC  
 GAGGGGGCTGAGGTGAACATGACCCTCGCAAAAACAGAGGCTAAGTTGATCCACGA  
 GAAATCTCAAAGAAGGCTTATAGTGATGAGGATATCATCAGGGTTATCGCTACCA  
 GGAGCAAAGCGCAGATTAATGCTACCGTGAATGAGTACAAAAATGCGTTTGGCAAT  
 GATATCAACAAGGACTTGAAGGCTGACCCCAAGGATGAATTCCTCTCGTTGTTGAG  
 GGCCACAGTGAAGTGCTTGACACGCCAGATAAGTATTTGAGAAGGTTCTTCGCC  
 TGGCTATCAACAAAAGAGGAACAGATGAAGGAGCTCTGACTAGAGTTGTGACTACT  
 AGGGCGGAGGTTGACATGAAGATTATAAAAGATGAGTACCAGCAAAGGAACAGTAT  
 TCCTTTGGAGACTGCCATTGCCAAGGACACCCATGGGGATTATGAAGATATGCTTC  
 TGGCGCTGATTGGGCATAAGGAGGATTGAGCTGTTAATCTGTCTCAAGGGGCATTA  
 TATCCATGAAGGTTGTTGTGCGGCTTGTGCATGTGGTTTCAACGGGGAATA

Primer MeAnn2-R

**Figure S1.** Cloning and sequence analysis of MeAnn2 cDNA from SC8 cassava. (a), Gel analysis of PCR product of MeAnn2 cDNA cloning from SC8 cassava. (b), Sequence of the *MeAnn2* cDNA cloning from SC8 cassava. The underline indicated the primer regions. The blue

characters indicated the coding sequences of *MeAnn2* (951 bp).

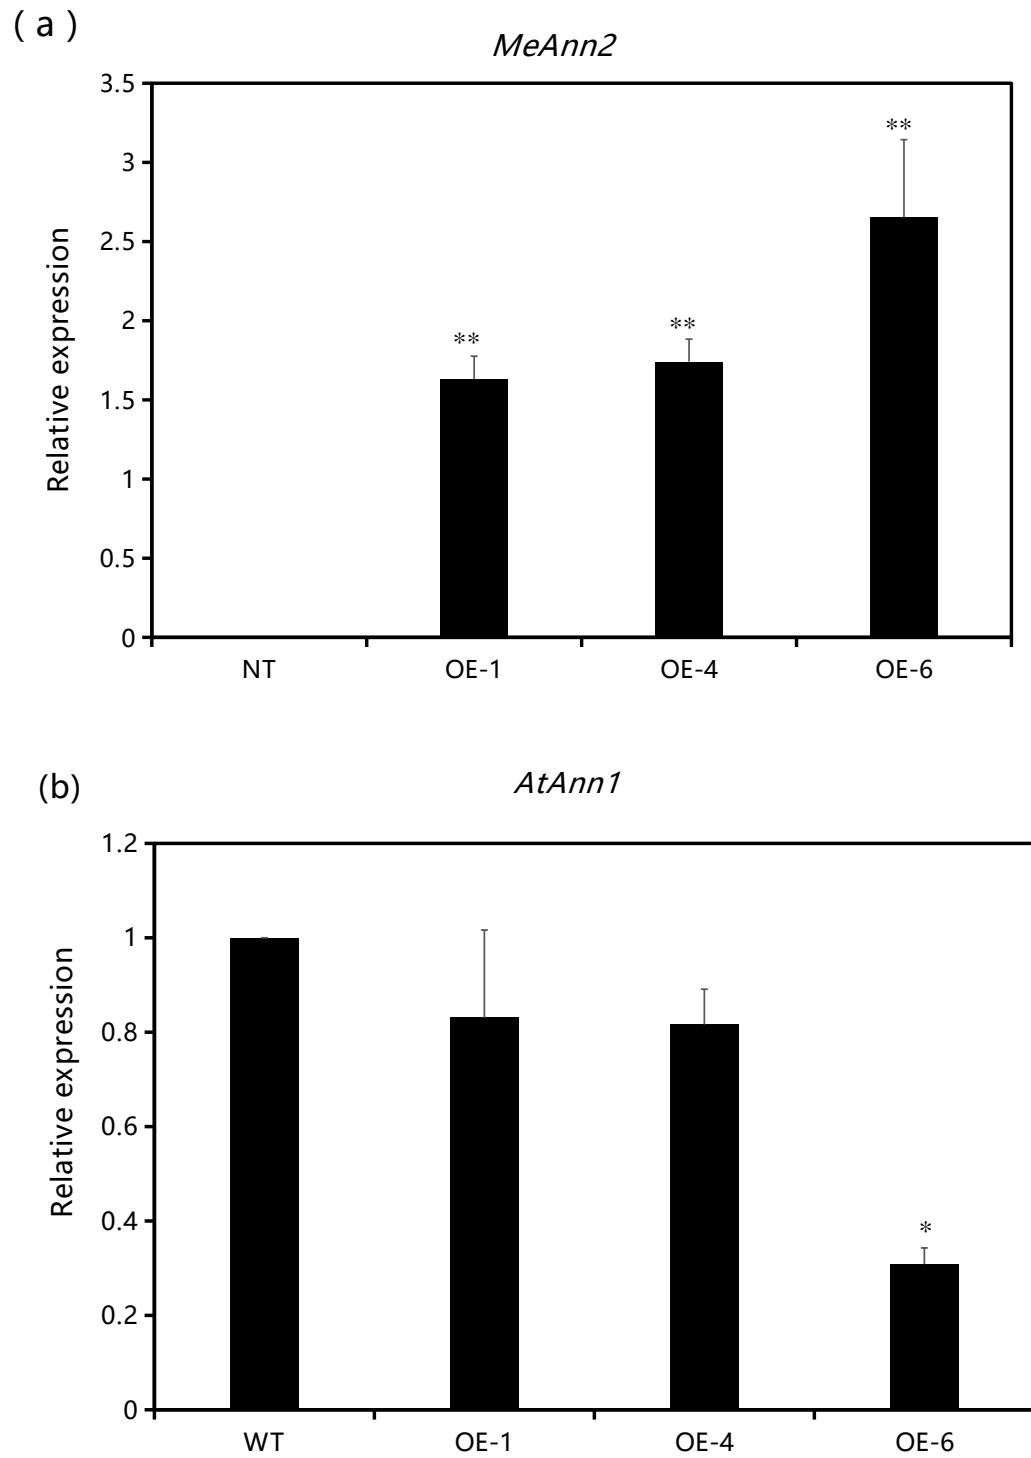

**Figure S2.** qRT-PCR analysis of the expression of (a) *MeAnn2* and (b) *AtAnn1* in transgenic Arabidopsis lines. Error bars indicate  $\pm$  SD. \*,  $n=3$ ,  $P \leq 0.05$ ; \*\*,  $P \leq 0.01$ .
