# Supplementary material for: Overexpression of Cassava MeAnn2 Enhances the Salt and IAA Tolerance of Transgenic Arabidopsis
Source: Plants (Basel). 2021 May 8;10(5):941. doi: 10.3390/plants10050941 (PMC8150822; doi:10.3390/plants10050941)
Supplement: Supplementary file 1 [file plants-10-00941-s001.zip › Table S1.xlsx]

## Sheet: Sheet1
Table S1. Amino acid sequences of annexins from different plants
Name	GenBank accession no.	protein sequence
AtAnn1	NP_174810.1	MATLKVSDSVPAPSDDAEQLRTAFEGWGTNEDLIISILAHRSAEQRKVIRQAYHETYGEDLLKTLDKELSNDFERAILLWTLEPGERDALLANEATKRWTSSNQVLMEVACTRTSTQLLHARQAYHARYKKSLEEDVAHHTTGDFRKLLVSLVTSYRYEGDEVNMTLAKQEAKLVHEKIKDKHYNDEDVIRILSTRSKAQINATFNRYQDDHGEEILKSLEEGDDDDKFLALLRSTIQCLTRPELYFVDVLRSAINKTGTDEGALTRIVTTRAEIDLKVIGEEYQRRNSIPLEKAITKDTRGDYEKMLVALLGEDDA
BjAnn1	AAR10457	MATLKVSSSVPSPSEDAEQLKSAFDGWGTNEELIISILAHRSAEQRKLIRQTYHESFGEDLLKSLEKELTSDFERAILLWTLEPGERDALLVNEATKRWTSSNQVLMEVACTRTSTQLLHARQAYHARFKKSIEEDVAHHTTGDFRKLLVSLVSSYRYEGEEVNMTLAKQEAKLIHEKIKDKHYNDEDFIRILSTRSKAQINATFNRYQDNHGEEILKSLEEGDEDDKFLGLLRSTIQCLTRPELYFVDVLRSAINKTGTDEGALTRIVTTRAEIDLKVIGQEYQRRNSIPLEKAITKDTRGDYEKMLIALLGEDDA
CkAnn	GU067483	MASLVVPPQVPSVAEDAEQLRKAFEGWGTKEDLIISILAHRNAGQRKAIRQVYAEKYGEDLLKALDKELTSDFERLVLLWTLDPHERDAVLANEATKRWTSSNQVLVEIACTRSPKQLILVREAYHARFKKSLEEDVAHHTTGDFCKLLLLLTTSYRYSGDEVNMSLAKSEAKILHEKIKDKHYNDDELIRIVSTRSRAQINATVNQYKNEFGNDILKDLEHKDDDDLRAILRATIECLVYPEAYFENILRESINKRGTEEGNLTRVVTTRAEVDLQIIKGLYHKRNSVSLERAVAKDTRGDYEKMLIALIGAEDA
MeAnn2	KM975563	MSTLIVPHTVPPVSDDCEQLRKAFSGWGTNEGLIISVLAHRNAAQRKLIRETYYEAYGEDLLKELDRELSNDFERVVLHWTLGPSERDAVLANEAAKKWTSSNQVLMEIACTRSSNELLHVRQAYHARYKKSLEEDVAQHTTGDFRKLLFPLVCSYRYEGAEVNMTLAKTEAKLIHEKISKKAYSDEDIIRVIATRSKAQINATVNEYKNAFGNDINKDLKADPKDEFLSLLRATVKCLTRPDKYFEKVLRLAINKRGTDEGALTRVVTTRAEVDMKIIKDEYQQRNSIPLETAIAKDTHGDYEDMLLALIGHKED
OsAnn1	XP_015644251.1	MATLTVPSAVPPVADDCDQLRKAFQGWGTNEALIISILAHRDAAQRRAIRRAYADTYGEELLRSITDEISGDFERAVILWTLDPAERDAVLANEVARKWYPGSGSRVLVEIACARGPAQLFAVRQAYHERFKRSLEEDVAAHATGDFRKLLVPLISAYRYEGPEVNTKLAHSEAKILHEKIQHKAYGDDEIIRILTTRSKAQLIATFNRYNDEYGHPINKDLKADPKDEFLSTLRAIIRCFCCPDRYFEKVIRLAIAGMGTDENSLTRIITTRAEVDLKLITEAYQKRNSVPLERAVAGDTSGDYERMLLALLGQEQ
PeAnn1	XP_011016329	MSTLTVPQQVPPVSEDVEQLRKAFSGWGTNEGLIISILGHRNAAQRKLIRQAYAEAYGEDLLKALDKELSNDFERVLLLWTLDPAERDAALANEATKRWTSSNQVLMEIACTRSSNELLLARQAYHARFKKSLEEDVAHHTIGDFRKLLFPLVSSYRYNGDEVNMTLAKSEAKMLHEKISNKAYSDEELIRILATRSKAQINATLNQYKNEFGNDINKDLKADPNDEFLALLRATVKCLTRPEKYFEKVLRLAINKRGTNEGALTRVVATRAEIDMKLIKDEYQRRNSIPLDRAIVKDTHGEYEKLLLELVGHQDA
StAnn1	XP_006355349	MSSLKVPASVPDPYEDAEQLKKAFKGWGTNEDLIIQILAHRNAAQRKLIRDSYAAAYGEDLLKDLDSELSSDFQRVVLLWTLSPAERDAYLVNEATKRLTASNWVIMETACTRSSDDLFKARQAYHARYKKSLEEDVAYHTSGDFRKLLIPLITAFRYEGDEVNMTLARKEANILHEKISDKAYNDEEIIRIISTRSKAQLSATFNHYNDHHGHEIIKDLEADDDDDEYLKLLRAAIECLKTPEKYFEKVLRLAIKKLGTDEWDLTRVVATRAEVDMERIKEEYHRRNSVTLDRAIAADTSGDYEKMLLALIGHGDA
